# Supplementary material
Source: PubMed Central journal article supplement (PMC4005981)

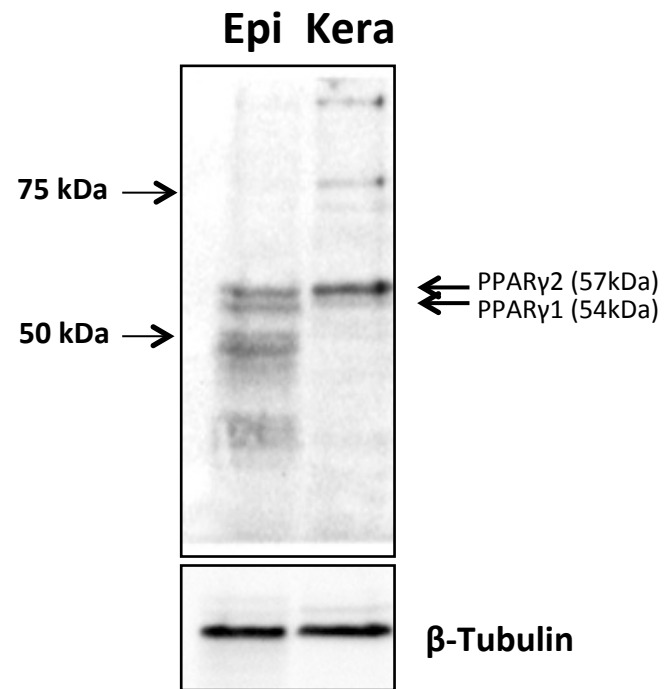

**Supplementary Figure 1**

Supplement: mmc1.pdf [file mmc1.pdf]

### AdipoRed Assay in Feline Orbital Fibroblasts

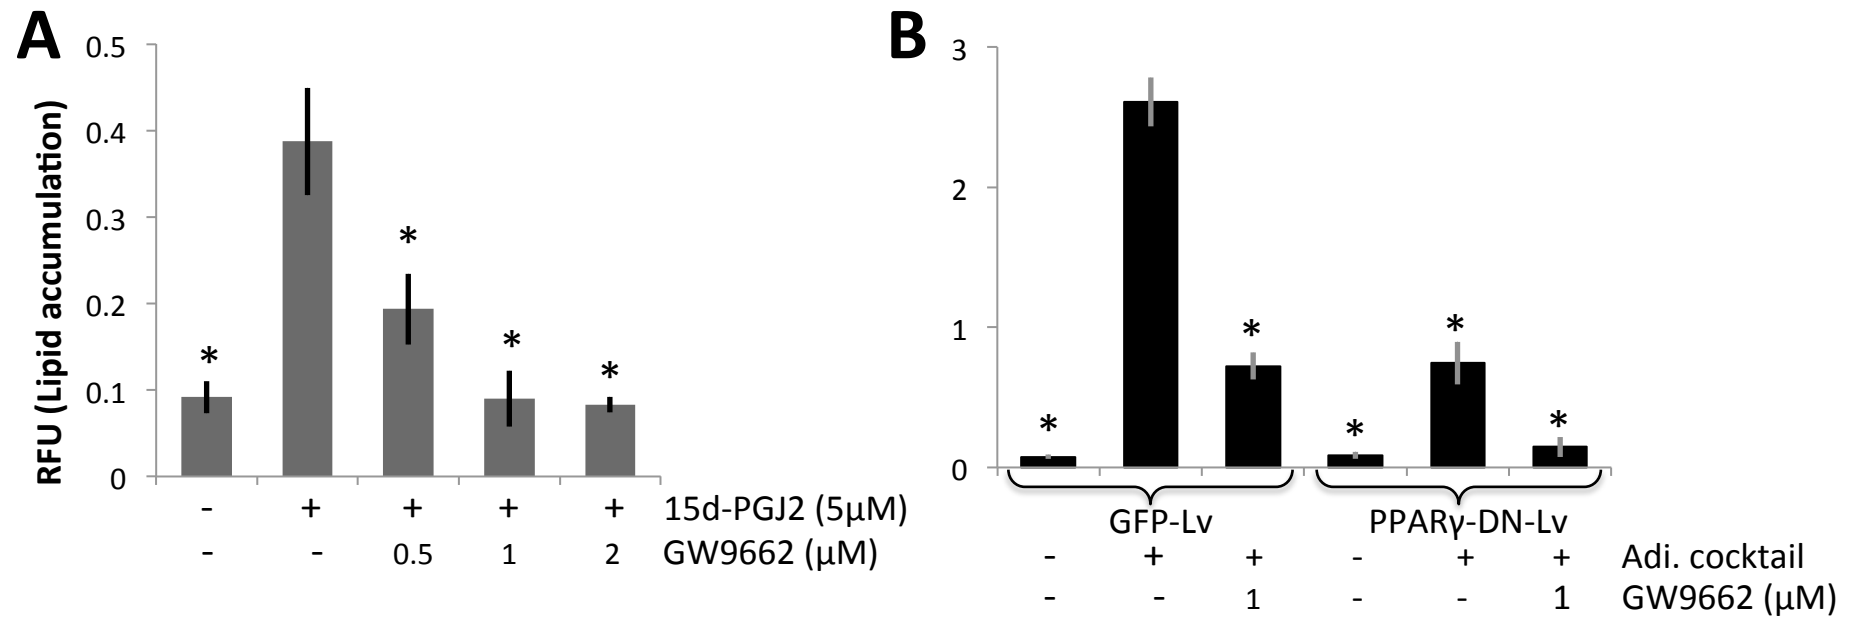

Supplementary Figure 2

Supplement: mmc2.pdf [file mmc2.pdf]
